# Supplementary material
Source: PubMed Central journal article supplement (PMC5101153)
Supplement: NIHMS816659-supplement-1.pdf [file NIHMS816659-supplement-1.pdf]

## Supplementary Data

### Supplementary Figure Legends

#### Supplementary Figures 1-6

#### Supplementary Tables 1-3

### Supplementary Figure Legends:

Supplementary Figure 1. Detection of human IL-6 secreted in human IL-6 knock-in RAG2<sup>-/-</sup>  $\gamma_c$ <sup>-/-</sup> mice by LPS stimulation.

RAG2<sup>-/-</sup>  $\gamma_c$ <sup>-/-</sup> mice were *i.p.* injected with 20 $\mu$ g LPS and serum samples were collected before and 2 hours after injection. (a) Human IL-6 level in serum samples of LPS injected IL-6m/m, IL-6h/m and IL-6h/h RAG2<sup>-/-</sup>  $\gamma_c$ <sup>-/-</sup> mice. (b) Mouse IL-6 level in serum samples of LPS injected IL-6m/m, IL-6h/m and IL-6h/h RAG2<sup>-/-</sup>  $\gamma_c$ <sup>-/-</sup> mice. Horizontal bars indicate the respective mean frequencies.

Supplementary Figure 2. Engraftment of human IL-6 dependent MM cell line INA-6 and development of a novel model for MM bone disease.

(a) Comparison of growth of INA-6 cells in IL-6<sup>m/m</sup> versus IL-6<sup>h/h</sup> mice. (b)  $\mu$ CT showing lytic destruction of bone in mice injected with INA-6 cells or sham injection. Right panel shows trabecular bone volume/tissue volume in the injected mice. (c) Comparison of growth of INA6 cells in RAG2<sup>-/-</sup>  $\gamma_c$ <sup>-/-</sup> mice expressing human IL-6, human SIRP $\alpha$ , or both (RGS6) mice. (d) Comparison of growth of primary CD138<sup>+</sup> tumor cells in RGS6 mice versus MIS<sup>(KI)</sup>TRG6 mice.

Supplementary Figure 3. Engraftment of tumor in MIS<sup>(KI)</sup>TRG6 vs SCID-hu models.

(a) Validation of SCID-hu model with injected INA-6 GFP<sup>+</sup> MM cell line. (b) Comparison of serum human light chain restricted monoclonal antibodies ( $\mu$ g/ml) detected by ELISA in mice engrafted with pre-neoplastic patient cells. (c) Comparison of serum levels of human sIL-6R (pg/ml) detected by ELISA in INA-6 cell line engrafted mice.

Supplementary Figure 4. Strategy for sorting tumor cells for genomic analysis.

Supplementary Figure 5. LOH analysis showing focal amplification of chromosome 1

Supplementary Figure 6. Sanger sequencing showing the presence of a xenograft-emergent mutation in the matched baseline sample isolated from the patient.

Supplementary Table 1. Patient Characteristics.

Supplementary Table 2. Summary statistics for whole exome sequencing analysis.

Supplementary Table 3. Source, clone and dilutions for antibodies.

Supplementary Figure S1

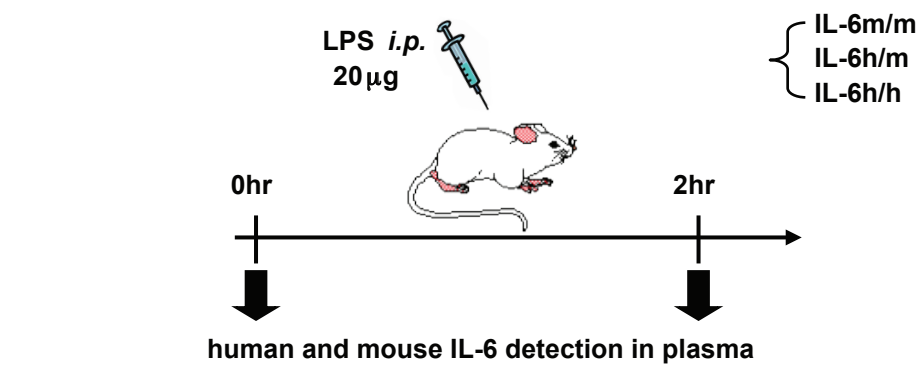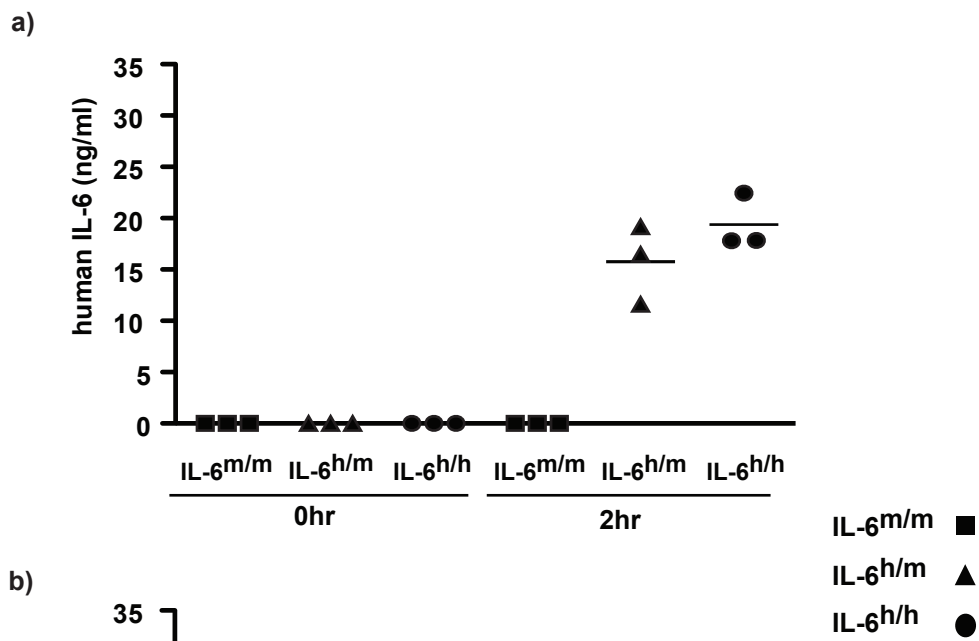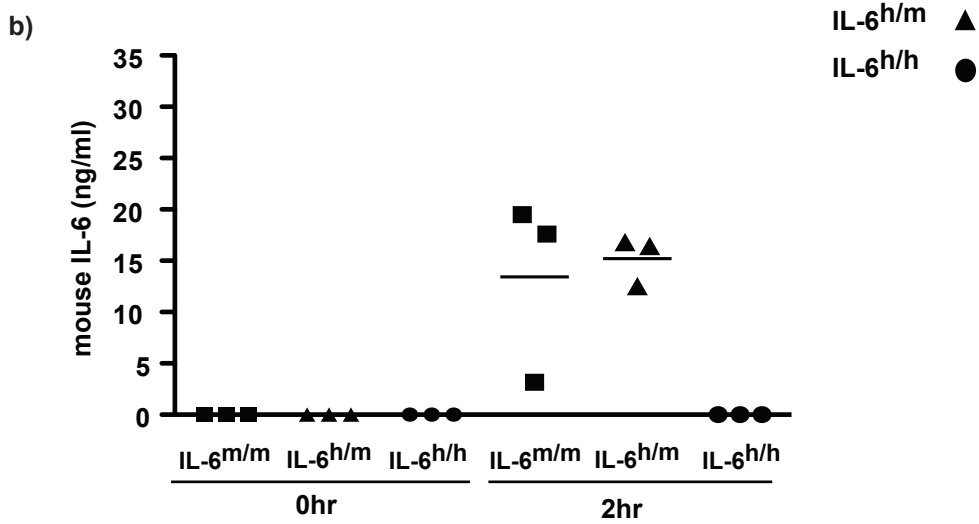

Supplementary Figure S2

a)

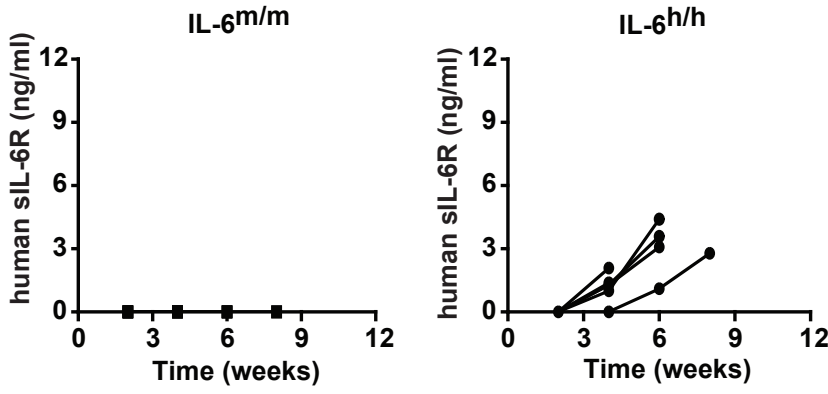

b)

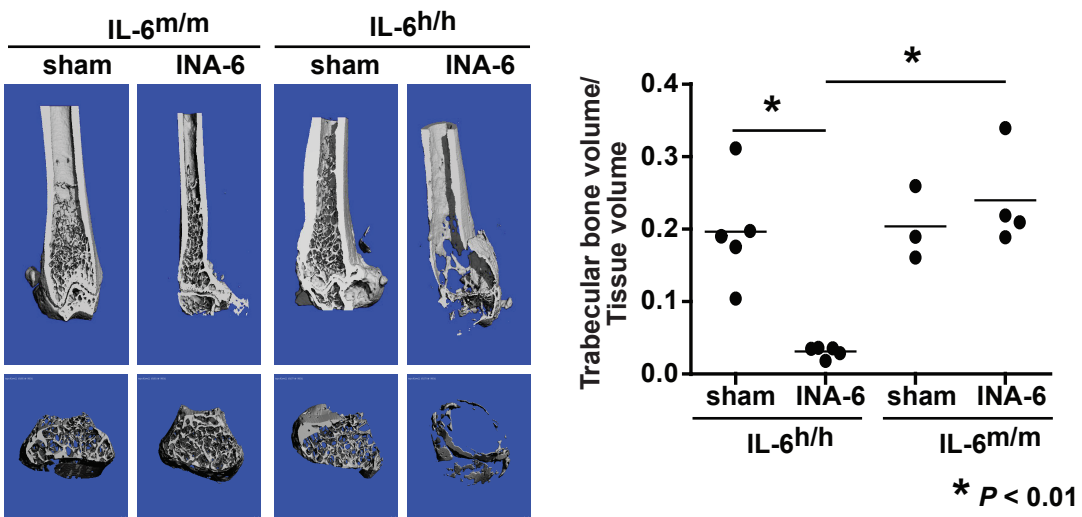

c)

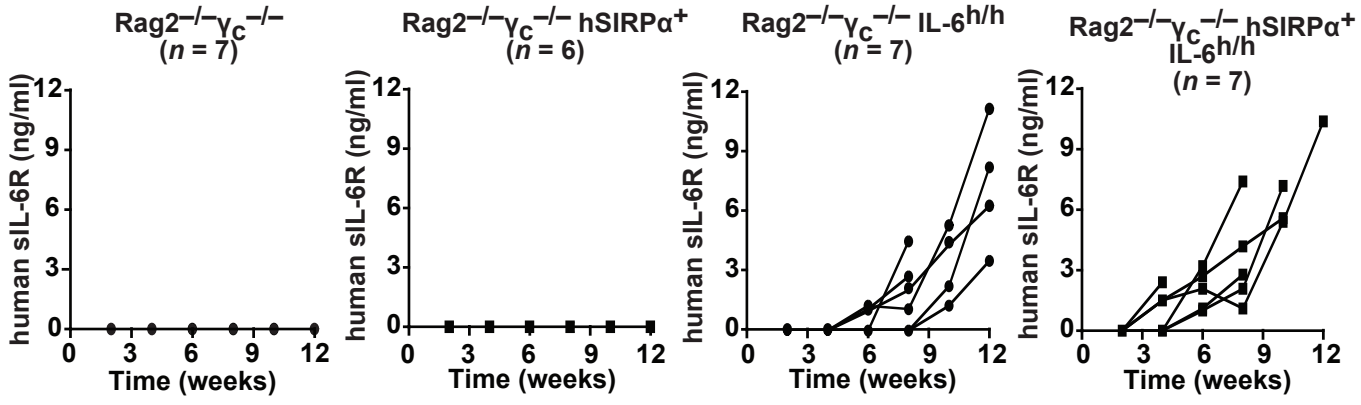

d)

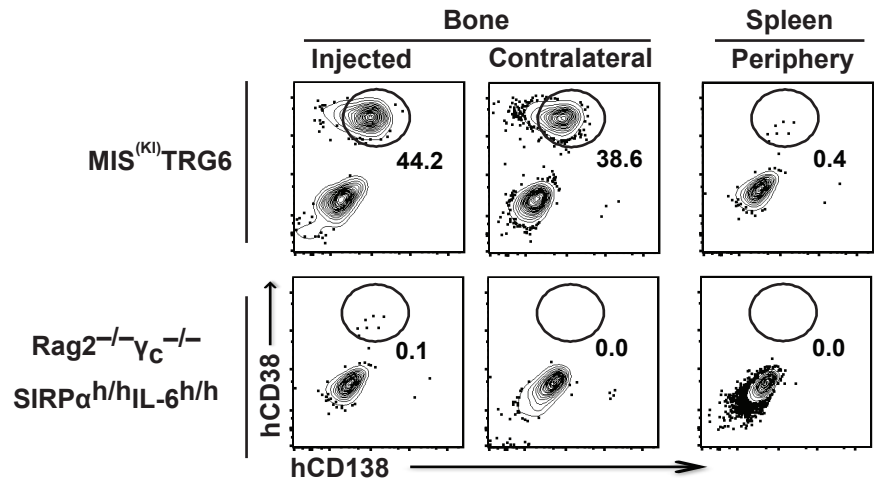



Supplementary Figure S3

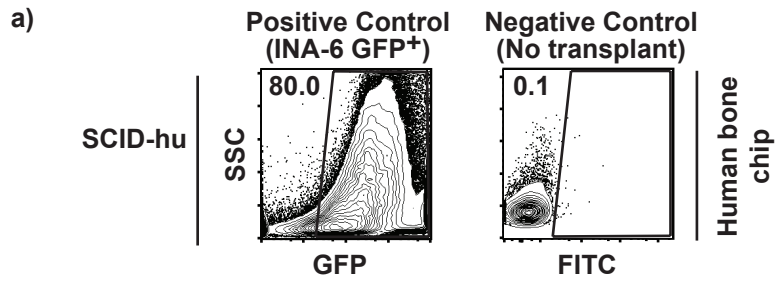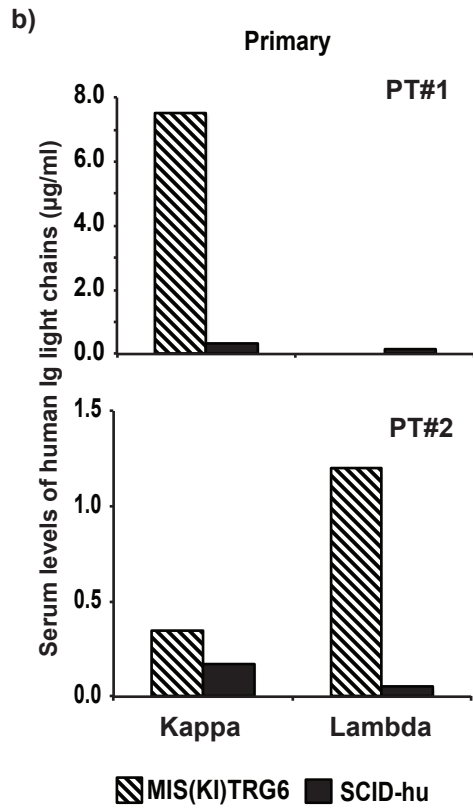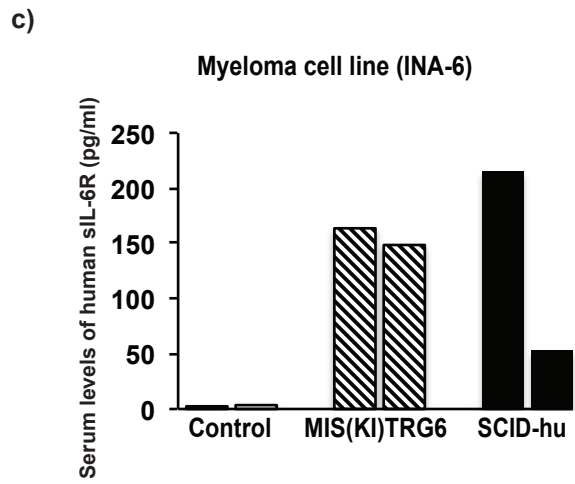

Supplementary Figure S4

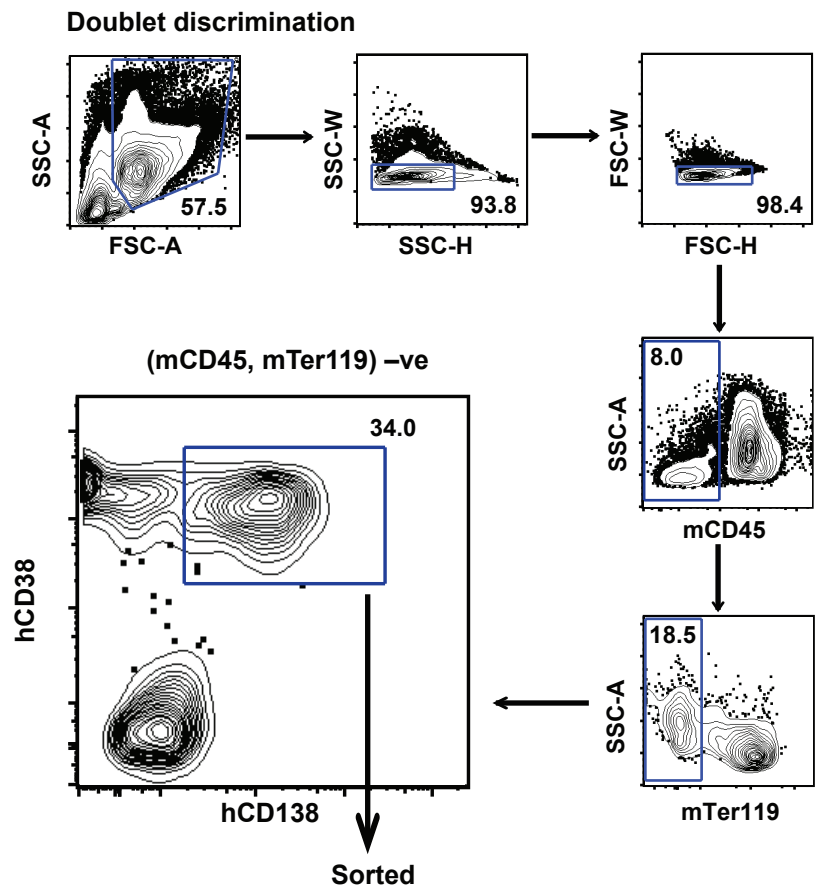

Supplementary Figure S5

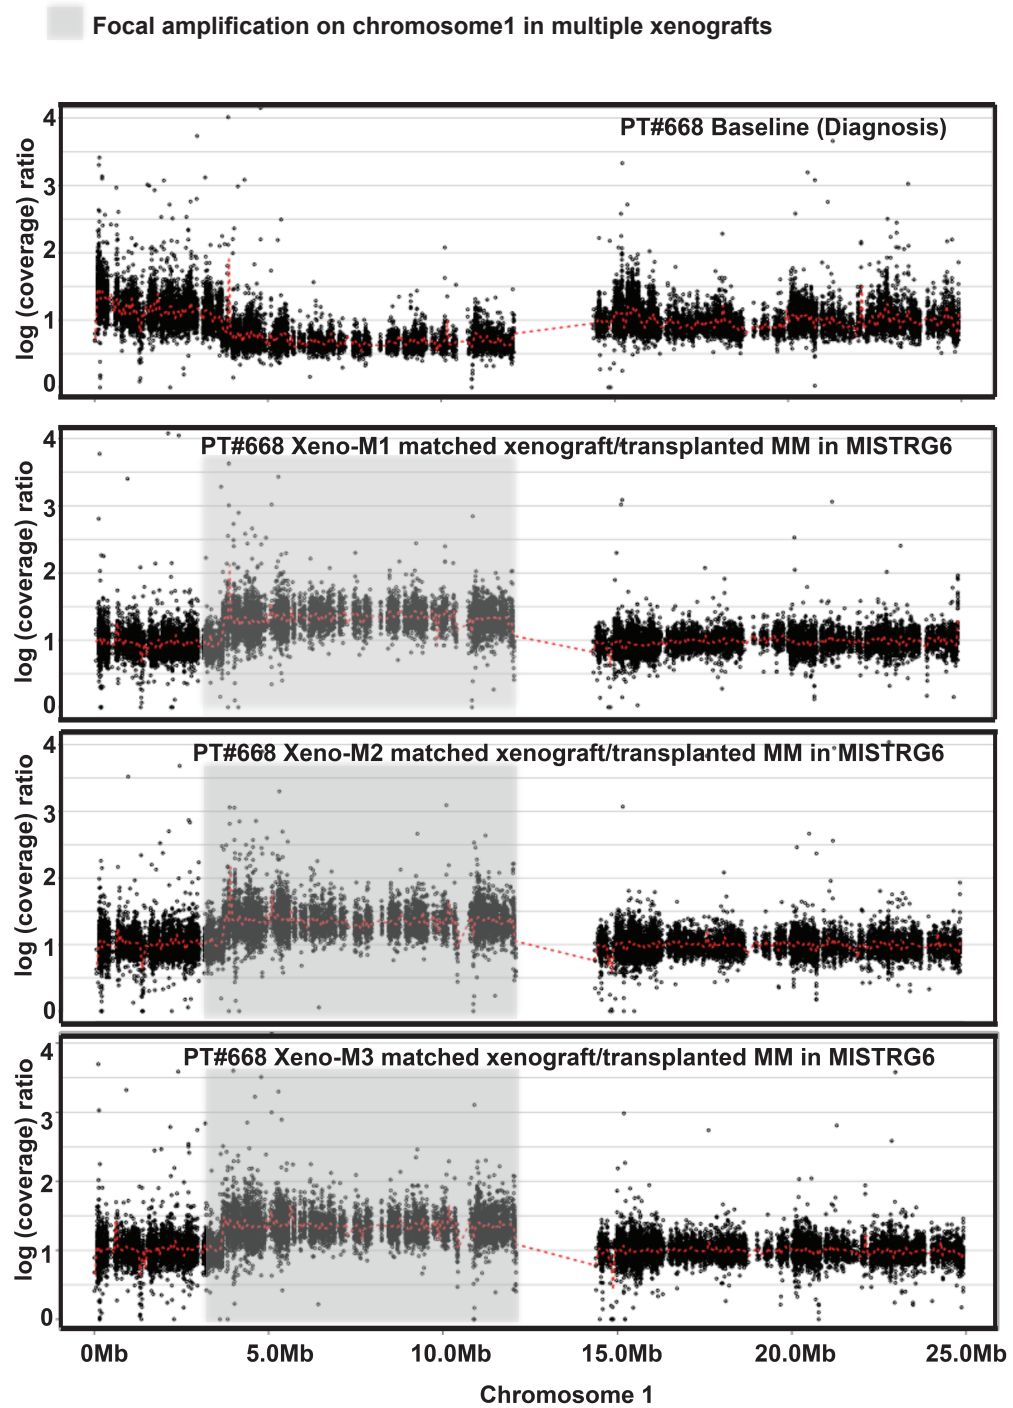



**Supplementary Table 1. Patient Characteristics**

| <b>All patients (N = 30)</b> | <b>n (%)</b> |
|------------------------------|--------------|
| Median age                   | 60           |
| Male                         | 17 (57%)     |
| Multiple myeloma             | 20 (67%)     |
| Plasma cell leukemia         | 3 (10%)      |
| Asymptomatic myeloma         | 4 (13%)      |
| MGUS                         | 3 (10%)      |
| Heavy chain type: IGG        | 20 (67%)     |
| Heavy chain type: IGA        | 7 (24%)      |
| Heavy chain type IGD         | 1 (3%)       |
| Light chain disease only     | 2 (6%)       |
| Light chain type: kappa      | 20 (67%)     |

**Supplementary Table 2. Summary statistics for whole exome sequencing analysis.**

|                                                 | <b>Germline samples</b> | <b>Tumor samples</b> |
|-------------------------------------------------|-------------------------|----------------------|
| <b>SE/PE</b>                                    | PE                      | PE                   |
| <b>Read length</b>                              | 74bp                    | 74bp                 |
| <b># of reads per lane (M)</b>                  | 87.5                    | 202.0                |
| <b>Median coverage (X)</b>                      | 64.3                    | 147.6                |
| <b>% of reads mapped on genome</b>              | 91.1%                   | 90.7%                |
| <b>% of reads mapped on target</b>              | 60.1%                   | 59.1%                |
| <b>% of targeted bases covered at least 8x</b>  | 96.6%                   | 98.3%                |
| <b>% of targeted bases covered at least 20x</b> | 89.1%                   | 96.5%                |
| <b>% of targeted bases covered at least 50x</b> | 62.4%                   | 88.3%                |

**Supplementary Table 3. Source, clone and dilutions for antibodies**

| <b>Flow cytometry</b>   |                           |               |              |                  |
|-------------------------|---------------------------|---------------|--------------|------------------|
| <b>Antibody against</b> | <b>Species reactivity</b> | <b>Source</b> | <b>Clone</b> | <b>Dilutions</b> |
| CD138                   | Human                     | BD Pharmingen | MI15         | 1:50             |
| CD19                    | Human                     | BD Horizon    | SJ25-C1      | 1:50             |
| CD3                     | Human                     | Biolegend     | UCHT1        | 1:100            |
| CD38                    | Human                     | BD Horizon    | HIT2         | 1:500            |
| CD45                    | Human                     | BD Pharmingen | HI30         | 1:100            |
| CD45                    | Mouse                     | BD Pharmingen | 30-511       | 1:400            |
| CD56                    | Human                     | Biolegend     | HCD56        | 1:800            |
| IgLambda                | Human                     | Biolegend     | MHL-38       | 1:100            |
| IgKappa                 | Human                     | Biolegend     | MHK-49       | 1:20             |
| Ter119                  | Mouse                     | BD Pharmingen | TER-119      | 1:400            |
| <b>Mass cytometry</b>   |                           |               |              |                  |
| <b>Antibody against</b> | <b>Species reactivity</b> | <b>Source</b> | <b>Clone</b> | <b>Dilutions</b> |
| CD11b                   | Human                     | Fluidigm      | ICRF44       | 1:100            |
| CD11c                   | Human                     | Fluidigm      | Bu15         | 1:100            |
| CD117                   | Human                     | Fluidigm      | 104D2        | 1:100            |
| CD138                   | Human                     | Biolegend     | MI15         | 1:100            |
| CD14                    | Human                     | Fluidigm      | RMO52        | 1:100            |
| CD16                    | Human                     | Biolegend     | 3G8          | 1:100            |
| CD185                   | Human                     | Biolegend     | J25D4        | 1:100            |
| CD19                    | Human                     | Fluidigm      | HIB19        | 1:100            |
| CD25                    | Human                     | Fluidigm      | 2A3          | 1:100            |
| CD274                   | Human                     | eBiosciences  | MIH1         | 1:100            |
| CD276                   | Human                     | Biolegend     | MIH42        | 1:100            |
| CD3                     | Human                     | Fluidigm      | UCHT1        | 1:100            |
| CD33                    | Human                     | Fluidigm      | WM53         | 1:100            |
| CD38                    | Human                     | Fluidigm      | HIT2         | 1:100            |
| CD4                     | Human                     | Fluidigm      | RPAT4        | 1:100            |
| CD45                    | Human                     | Fluidigm      | HI30         | 1:100            |
| CD45                    | Mouse                     | Fluidigm      | 30-F11       | 1:100            |
| CD56                    | Human                     | BD Pharmingen | HCD56        | 1:100            |
| CD8                     | Human                     | Fluidigm      | RPAT8        | 1:100            |
| CD95                    | Human                     | Fluidigm      | DX2          | 1:100            |
| FoxP3                   | Human                     | Fluidigm      | PCH101       | 1:100            |
| HLA-DR                  | Human                     | Biolegend     | L243         | 1:100            |
| IgLambda                | Human                     | Fluidigm      | MHL-38       | 1:100            |
| IgKappa                 | Human                     | Fluidigm      | MHK-49       | 1:100            |
| Ki-67                   | Human                     | Fluidigm      | Ki-67        | 1:100            |
| Ter-119                 | Mouse                     | Fluidigm      | TER-119      | 1:100            |
| TIM-3                   | Human                     | Fluidigm      | F38-2E2      | 1:100            |
